# Supplementary material for: Microwave-assisted synthesis of Cu2O microcrystals with systematic shape evolution from octahedral to cubic and their comparative photocatalytic activities
Source: Royal Society of Chemistry journal article supplement (doi:10.1039/c4ra05015k), 2014-01-01
Supplement: c4ra05015k1.pdf [file c4ra05015k1.pdf]

Supplementary Material (ESI) for RSC Advances  
This journal is © The Royal Society of Chemistry

## Microwave-Assisted Synthesis of Cu<sub>2</sub>O Microcrystals with Systematic Shape Evolution from Octahedral to Cubic and Their Comparative Photocatalytic Activities

Hongdan Zhang<sup>1</sup>, Fuyang Liu<sup>1</sup>, Benxian Li<sup>2</sup>, Jiasheng Xu<sup>3</sup> and Xiaoyang Liu<sup>1,2\*</sup>

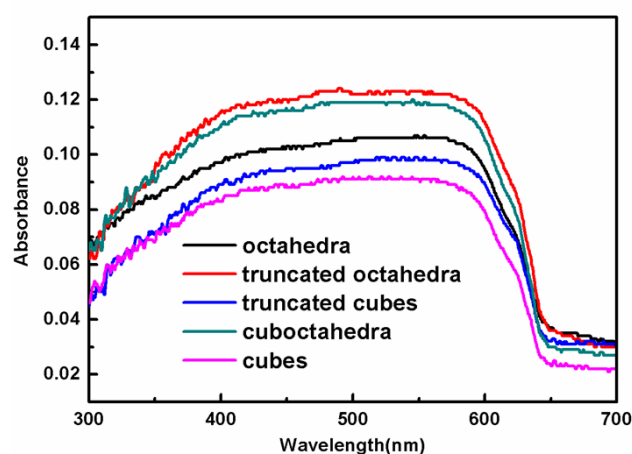

**Figure S1.** UV-vis absorption spectra of Cu<sub>2</sub>O products with different morphologies: octahedra, truncated octahedra, truncated cubes cuboctahedra and cubes.

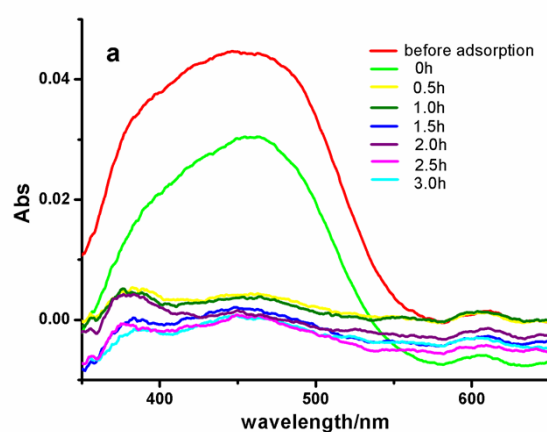

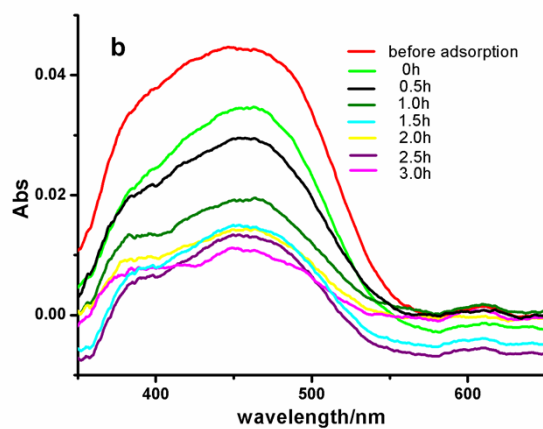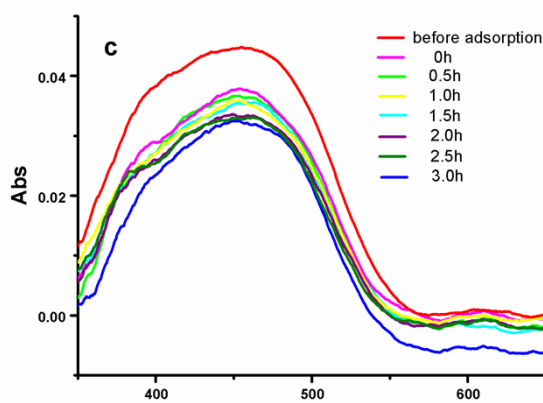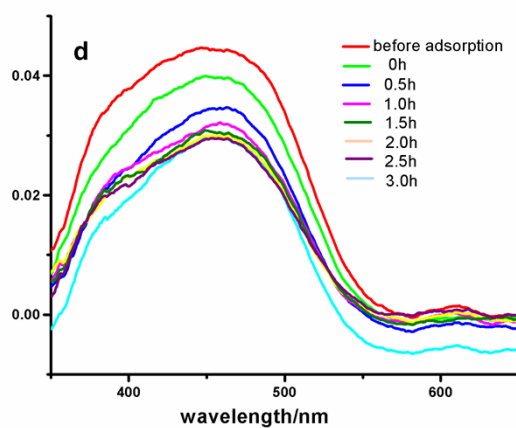

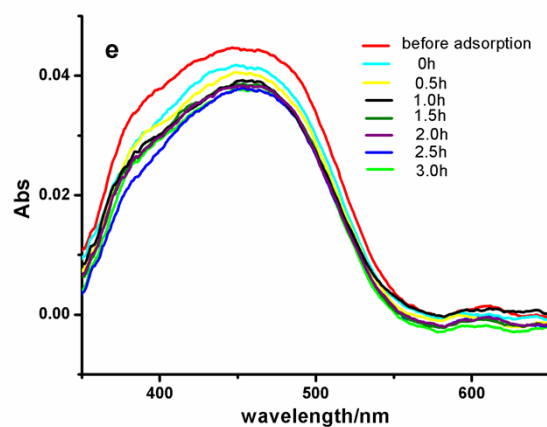

**Figure S2.** UV-vis absorption spectra of methyl orange as a function of irradiation time using (a) cubes, (b) truncated octahedra, (c) cuboctahedra, (d) truncated cubes and, (e) cubes, respectively.

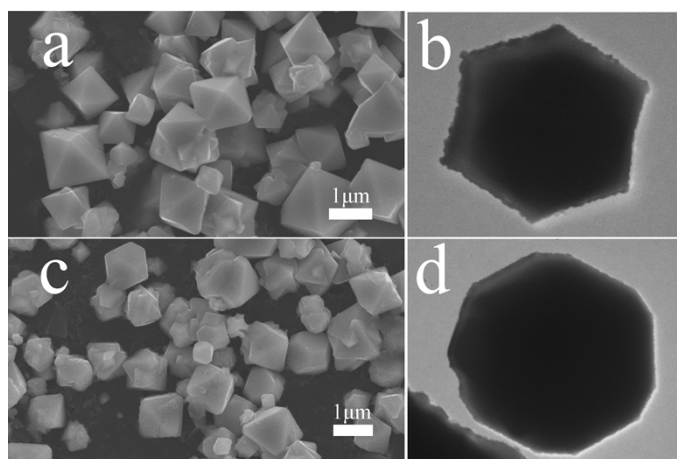

**Figure S3.** SEM images of the Cu<sub>2</sub>O microcrystals with various morphologies after the photocatalytic experiment: (a) octahedra, (c) truncated octahedra. Scale bar = 1 μm. TEM images of the Cu<sub>2</sub>O microcrystals with various morphologies after the photocatalytic experiment: (b) octahedra, (d) truncated octahedra.
